# Supplementary material for: Provenancing Archaeological Wool Textiles from Medieval Northern Europe by Light Stable Isotope Analysis (δ13C, δ15N, δ2H)
Source: PLoS One. 2016 Oct 20;11(10):e0162330. doi: 10.1371/journal.pone.0162330 (PMC5072590; doi:10.1371/journal.pone.0162330)
Supplement: S1 Table — (XLSX) [file pone.0162330.s001.xlsx]

## Sheet: Holstein2016S1table
ID	Site	Context date	Sf/context no	Type	Spin	Density	Dye	Pigment	Fleece	Other	Assessment	Subsamples IRMS	Subsamples HPLC
2894	RKH	1000-1200	2001-26-30 (i)	Yarn	S+Z	-	nt	nt	nt		typical	1	1
2895	RKH	1000-1200	2001-26-31	2/2 plain twill	ZS	8x8	nt	nt	nt		typical	1	1
3961	RKH	1000-1200	2001-26-46	Cord	Z2S	-	nt	nt	nt		typical	1	1
2896ave	RKH	1200-1400	1999-18-57	2/2 plain twill	ZS	11x8	nt	nt	nt		typical	3	2
2897	RKH	1200-1400	2000-6-187 (a)	2/2 plain twill	ZS	10x9	nt	nt	nt		typical	1	1
2898	RKH	1200-1400	2000-6-187 (b)	2/2 plain twill	ZS	13x10	nt	nt	nt	Teaselled and sheared	typical	1	1
2899	RKH	1200-1400	2000-6-208 Box 1 (f)	2/2 plain twill	ZS	?	nt	nt	nt		typical	1	2
2901	RKH	1200-1400	2000-6-208 Box 2 (g)	2/2 plain twill	ZS	12x8	nt	nt	nt		typical	1	1
3962	RKH	1200-1400	2000-6-187 (c)	2/2 plain twill	ZS	12x9	nt	nt	nt	even	typical	1	1
3963	RKH	1200-1400	2000-6-208 Box 1 (f)	2/2 plain twill	ZS	?	nt	nt	nt		typical	1	1
3964	RKH	1200-1400	2000-6-208 Box 2 (c)	2/2 plain twill	ZS	10x9	nt	nt	nt		typical	1	1
3965	RKH	1200-1400	2001-26-76 (iii)	Staple	-	-	nt	nt	nt		typical	1	1
2902	RKH	1400-1600	1989-33-380 (a)	2/2 plain twill	ZS	8x7	nt	nt	nt		typical	1	1
2903	RKH	1400-1600	1989-33-380 (f)	Tabby	?SS	16x8	nt	nt	nt		atypical	1	1
2904	RKH	1400-1600	1989-33-380 (g)	Yarn	Z	-	nt	nt	nt		typical	1	1
2950ave	RKH	1400-1600	1989-33-380 (iii)	Staple	-	-	nt	nt	nt		typical	10	1
3966	RKH	1400-1600	2000-6-130	Tabby	Z+S/S	10x8	nt	nt	nt		atypical	1	1
3967	RKH	1400-1600	1989-33-380 (c)	Tabby	SS	12x12	nt	nt	nt	Teaselled and sheared	atypical	1	1
3968	RKH	1400-1600	1989-33-380 (d)	Tabby	SS	10x10	nt	nt	nt	Teaselled and sheared	atypical	1	1
2906	RKH	1400-1600	1989-33-380 (i) (b)	Staple	-	-	nt	nt	nt		typical	1	1
4120ave	RKH	1200-1400	2000-6-208 Box 1	2/2 plain twill	ZS	?	nt	nt	nt		typical	9	3
4329	HSS	C7-8	HE4	2/1 plain twill	ZS	14x10	madder	none	HM x2		atypical	1	1
4330	HSS	C7-8	HE21b	2/2 chevron/diamond twill	ZS	11x8	ndd	dense and medium	HM x2		typical	1	1
4331	HSS	C7-8	HE27 (weft only)	Tabby	ZS	3.5x3	ndd	dense on 4% (coarser fibres only)	HM		typical	1	1
4332	HSS	C7-8	HE33a	Tabby	?	?	ndd	none	?M x2	open	atypical	1	1
4333	HSS	C7-8	HE41	Staple	-	-	ndd	moderate/light	H		typical	1	1
4334	HSS	C7-8	HE50	Staple	-	-	ndd	dense	HM		typical	1	1
4335	HSS	C7-8	HE69a	Staple	-	-	ndd	medium on 5% (coarser fibres only)	HM	?fell wool	typical	1	1
4336	HSS	C7-8	HE76c	Tabby	ZS	-	ndd	dense	HM x2	?band	typical	1	1
4337	HSS	C7-8	HE77a	2/2 diamond twill	ZS	7x8	ndd	variable, 15-88% dense	HM x2		typical	1	1
4338	HSS	C7-8	HE92	2/2 diamond twill	ZS	10x10	ndd	light	H 2		typical	1	1
3959	YCG	930-975	Cat. no 1309 Context 32725 sf no 13517	Nålebinding	S2Z	-	ndd	none	nt	sock	atypical	1	1
4058	YCG	850-900	Cat. no 1255 Context 34882 cess pit fill Sf no 13584	Staple	-	-	ndd	none	H		typical	1	1
4060a	YCG	850-900	Cat. no 1259 Context 34910 pit fill Sf no 13382	Tabby	ZS	12x8	ndd	dense	H x HM	loose	typical	1	1
4060b	YCG	850-900	Cat. no 1259 Context 34910 pit fill Sf no 13382	Yarn	Z2S	-	ndd	none	nt	sewn through 4060a	typical	1	1
4062	YCG	930-975	Cat. no 1289 Context 32725 Sf no 13525	Staple	-	-	ndd	none	HM		typical	1	1
4063	YCG	930-975	Cat. no 1290 Context 28432 Sf no 10519	Staple	-	-	ndd	none	HM		typical	1	1
4064	YCG	930-975	Cat. no 1295 Context 32725 Sf no 13520	Tabby, piled	ZS	5x4	ndd	none	H x H	ground of 4065	hybrid typical/atypical	1	1
4065	YCG	930-975	Cat. no 1295 Context 32725 Sf no 13520	Yarn	S	-	ndd	none	H	pile of 4064	hybrid typical/atypical	1	1
4066	YCG	930-975	Cat. no 1300 Context 28432 Sf no 10535	2/2 plain twill	ZS	14x7	ndd	none	GM x H		typical	1	1
4068	YCG	930-975	Cat. no 1303 Context 32725 Sf no 13524	2/2 chevron twill	ZS	10-11x6-7	ndd	dense (warp, Z)/none (weft, S)	H x HM	vaðmál	atypical	1	1
4069	YCG	930-975	Cat. no 1305 Context 27093 Sf no 9633	2/2 chevron twill	ZS	16x12	ndd	none	GM x HM		typical	1	1
4070	YCG	930-975	Cat. no 1306 Context 27093 Sf no 9633	2/2 chevron twill	ZS	18x16	lichen purple	none	HM x M	very even	atypical	1	1
4072	YCG	975-1050	Cat. no 1377 Context 1473 Sf no 407	Staple	-	-	ndd	none	GM		typical	1	1
4073	YCG	975-1050	Cat. no 1381 Context 1473 Sf no 12912	2/2 diamond twill	ZS	14x11	madder	nt	nt		typical	1	1
4074	YCG	C13-14	Cat. no 1413 Context 4829 Sf no 16063	Staple	-	-	ndd	none	SF		typical	1	1
4075	YCG	C13	Cat. no 1415 Context 10879 Sf no 2703	2/1 plain twill	Z/S+Z	11x6-7	ndd	none	M x SF+HM		typical	1	1
4077	YCG	C13	Cat. no 1423 Context 10879 Sf no 2692	Yarn	Z	-	ndd	none	H		typical	1	1
4078ave	YCG	Anglo-Scandinavian	Cat. no 1460 Context 2070 Sf no 247(a)	Tabby, piled	ZS	5x5	madder	none	H x H + H	locks of loosely twisted wool darned in	typical	3	1
4079	YCG	Anglo-Scandinavian	Cat. no 1460 Context 2070 Sf no 247(b)	Tabby	ZZ	24x16	ndd	none	nt	binding of 4078	atypical	1	1
4080	YCG	Anglo-Scandinavian	Cat. no 1460 Context 2070 Sf no 247	Yarn	Z2S	-	ndd	none	nt	thread joining 4078 and 4079	typical	1	1
4095	YCG	930-975	Cat. No 1297 Context 28432 Sf no 10519	Tabby	ZS	4x3-4	ndd	none	M x HM	uneven, loose	typical	1	1
4081	YLB	930-1040	Cat. no 565 Context Trench II, 10 Sf no 5075	2/1 diamond twill	ZZ	22x11	nt	nt	nt	accurate diamond meetings	unknown	1	1
4082	YLB	930-1040	Cat. no 569 Context Trench II, 10 Sf no 5252	2/1 diamond twill	ZZ	20x11	nt	nt	nt		unknown	1	1
4083	YLB	930-1040	Cat. no 570 Context Trench III, 6 Sf no 5073	2/1 diamond twill	ZZ	16x10	nt	nt	nt	accurate diamond meetings	unknown	1	1
4085	YLB	930-1040	Cat. no 574 Context Trench II, 10 Sf no 5077	2/1 chevron twill	ZS	20x14	nt	nt	nt		typical	1	1
4086	YLB	930-1040	Cat. no 577 Context Trench II, 10 Sf no 5076	2/2 diamond twill	Z/Z+S	14x9	nt	nt	nt	inaccurate diamond meetings	typical	1	1
4087ave	YLB	930-1040	Cat. no 579 Context Trench II, 16 Sf no ?5098	2/2 diamond twill, piled	ZS	12x7	nt	nt	nt	S-spun thread darned in as pile	typical	2	2
4088	YLB	930-1040	Cat. no 580 Context Trench II, 7 Sf no 5275	Tabby(?)	ZS	4x3	nt	nt	nt	fulled/matted	typical	1	1
4089	YLB	930-1040	Cat. no 582 Context Trench II, 7 Sf no 5276	Tabby	SS	5x3.5	nt	nt	nt	errors in weave	typical	1	1
4092	YLB	930-1040	Cat. no 587 Context Trench II, 10 Sf no 5281	2/2 plain twill	Z/S+Z	6x5	nt	nt	nt		typical	1	1
4093	YLB	930-1040	Cat. no 588 Context Trench II, 10 Sf no 5282	?2/1 plain twill	Z/S+Z	4.5x5	nt	nt	nt		typical	1	1
4094	YLB	930-1040	Cat. no 591 Context Trench II, 30 Sf no 5176	Tabby repp	ZZ	22x12	madder	nt	nt		typical	1	1
4121	YSG	Anglo-Scandinavian	Sf 19b, context 5021	2/1 diamond twill	ZZ	22-24x14-16	?lichen purple?	a few densly pigmented fibres	H/HM		unknown	1	1
4122	YSG	Anglo-Scandinavian	Sf 19c, context 5021	2/2 plain twill	ZS	10x7	ndd	moderate	nt		typical	0	1
4123	YSG	Anglo-Scandinavian	Sf 19e, context 5021	2/2 twill	ZS	10x10	tannin	light	nt		typical	1	1
4124	YSG	Anglo-Scandinavian	Sf 19h, context 5021	2/1 twill	SS	5x4	ndd	none	HM x HM		typical	1	1
4125	YSG	Anglo-Scandinavian	Sf 404, context 9021	Tabby	ZS	6-8x4	Indigotin + tannin	none	GM x HM	shaggy pile on both faces	atypical	1	1
3944	NBG	1st half C15th	BGT26, T13	Knit	Z2S	3x5.4*	kermes	none	F		atypical	1	1
3945	NBG	1st half C15th	BGT26, T11	2/2 plain twill	ZZ	14x12	nt	nt	nt	heavily fulled	typical	1	1
3946	NBG	1st half C15th	BGT26, T12	Tabby	SS	5-6x5	nt	nt	nt	light-medium fulled	typical	1	1
3948	NBG	1st half C15th	BGT14, T4	2/2 plain twill	SS	22x20	nt	nt	nt	lightly fulled	typical	1	1
3949	NBG	1st half C15th	BGT14, T5	Tabby	SS	6x5	nt	nt	nt	medium fulled	typical	1	1
3950	NBG	Beginning C16th	BGT59, T47-50	Knit	?Z2S	3.4x5*	nt	moderate/light	S	cap, lightly fulled	typical	1	1
3951	NBG	Beginning C16th	BGT59, T51-55	Knit	?Z2S	4.4x7*	nt	nt	nt	cap	typical	1	1
3952	NBG	Beginning C16th	BGT63, T64	2/2 plain twill	ZZ	13x86-96	nt	nt	nt	worsted	typical	1	1
3953	NBG	Beginning C16th	BGT63, T65	Tabby	SS	11x8	nt	nt	nt	lightly fulled	typical	1	1
3954	NBG	Beginning C16th	BGT59, T33	Tabby	SS	7x5	nt	nt	nt		typical	1	1
3955	NBG	Beginning C16th	BGT59, T41	Tabby	SS	14x11	nt	nt	nt	very lightly fulled	typical	1	1
3957	NBG	Beginning C16th	BGT59, T27	Tabby	SS	8x8	nt	nt	nt	medium fulled, ?weft-faced	typical	1	1
4544	NQS	mid-late C13th	T4, context 574	2/1 plain twill	ZS	10x7	madder	none	HxHM		typical	1	1
4545	NQS	mid-late C13th	T5, context 574	2/2 plain twill	ZS	7x5	ndd	none	HMxM		typical	1	1
4546	NQS	mid-late C13th	T7, context 630	Tabby	S2Z/S2Z	2x2	ndd	none	nt	?wool	typical	1	1
4547	NQS	mid-late C13th	T8, context 639	Tabby	Z2SxZ2S	2-3x3	ndd	none	nt	goat hair	typical	1	1
	* For knitted samples, figures indicate stitches/cm and rows/cm
												105	89
