# Supplementary material for: Provenancing Archaeological Wool Textiles from Medieval Northern Europe by Light Stable Isotope Analysis (δ13C, δ15N, δ2H)
Source: PLoS One. 2016 Oct 20;11(10):e0162330. doi: 10.1371/journal.pone.0162330 (PMC5072590; doi:10.1371/journal.pone.0162330)
Supplement: S2 Table — For multiply-sampled objects, means are given. (XLSX) [file pone.0162330.s002.xlsx]

## Sheet: Holstein2016S2table
ID	Site	Yield %	C% mass	N% mass	δ13C/‰	δ15N/‰	δ2H/‰	C:Natom
4329	HSS	0.749709	44.6372	13.1619	-23.3449	8.92371	-93.9679	3.77874
4330	HSS	-	45.6855	13.7766	-23.5166	4.68987	-107.897	3.79413
4331	HSS	0.887544	45.7733	13.8607	-23.2393	9.42945	-78.7886	3.86888
4332	HSS	0.81864	46.2436	14.2775	-24.2955	10.6709	-94.8901	3.95663
4333	HSS	0.814394	45.5982	14.1368	-22.2043	10.4041	-86.359	3.76309
4334	HSS	0.927215	46.2237	13.9676	-23.4639	10.2604	-80.4698	3.86092
4335	HSS	0.642895	49.2337	15.1192	-22.8891	11.1064	-89.736	3.79909
4336	HSS	0.859756	44.9635	13.6108	-24.3826	6.22021	-102.93	3.8541
4337	HSS	-	45.6896	14.043	-23.2393	9.42945	-82.3881	3.86888
4338	HSS	-	46.9418	14.8819	-22.5588	9.92372	-81.1121	3.6784
3944	NBG	0.844414	33.3181	10.4175	-24.1792	6.98457	-87.8602	3.7297
3945	NBG	0.800134	33.7876	11.061	-24.4137	7.1785	-86.863	3.56221
3946	NBG	0.733672	35.7888	11.3401	-24.7846	5.6759	-89.2858	3.68033
3948	NBG	0.89695	37.1092	12.1084	-23.9323	4.84752	-87.5354	3.57397
3949	NBG	0.756658	37.9933	11.9944	-24.8694	5.04493	-98.4066	3.6939
3950	NBG	0.837095	28.4442	8.10841	-24.8177	7.5461	-88.7431	4.09086
3951	NBG	0.81249	34.8076	10.8255	-24.5657	7.32918	-87.191	3.7496
3952	NBG	0.900976	40.633	13.0473	-23.2893	7.08228	-86.504	3.63175
3953	NBG	0.752078	38.0729	12.3162	-24.4323	5.25889	-89.2302	3.60493
3954	NBG	0.740244	40.239	12.6028	-24.7606	5.5969	-91.3959	3.72337
3955	NBG	0.845995	33.3094	10.3799	-23.983	5.2962	-86.4715	3.74224
3957	NBG	0.861351	40.2877	13.0397	-24.6565	5.3144	-94.7574	3.60298
4544	NQS	0.661986	46.084	14.1243	-23.8068	8.71888	-90.1038	3.80653
4545	NQS	0.416212	45.6564	13.4883	-23.7636	8.6839	-88.4653	3.94902
4546	NQS	0.781402	46.2485	14.025	-23.9818	4.42417	-92.4554	3.84717
4547	NQS	0.513228	45.3239	14.3766	-23.9998	6.59693	-89.2533	3.67805
2894	RKH	0.716745	43.4381	11.8384	-24.2721	1.92306	-118.336	4.27892
2895	RKH	0.295046	37.9983	9.74909	-24.0459	3.15359	-111.439	4.54524
2897	RKH	0.397084	40.739	12.0302	-23.7413	2.2823	-101.682	3.94905
2898	RKH	0.413381	38.5866	11.3917	-23.6732	2.35944	-101.567	3.95005
2899	RKH	0.734613	36.9425	9.88636	-24.0313	4.07482	-103.04	4.35759
2901	RKH	0.537	42.9092	11.75	-24.1392	3.51441	-100.816	4.25864
2902	RKH	0.32331	42.3567	13.0454	-23.9563	2.82147	-95.0333	3.78637
2903	RKH	0.699605	43.8344	13.2143	-24.0553	6.80234	-77.7891	3.86837
2904	RKH	0.914822	44.4535	13.3536	-23.6759	2.54841	-105.921	3.88209
2906	RKH	-	38.9192	13.2436	-23.7847	1.14043	-105.775	3.427
3961	RKH	0.851027	40.109	11.5	-23.2569	0.389398	-93.7329	4.06725
3962	RKH	0.250889	31.2693	10.2656	-23.9111	2.19612	-98.9492	3.55214
3963	RKH	0.634119	34.5088	10.4318	-24.2338	2.77825	-104.106	3.85769
3964	RKH	0.876425	30.8578	9.67802	-24.2097	3.32273	-109.329	3.71822
3965	RKH	0.579703	38.2528	13.4405	-23.8255	2.63449	-100.484	3.31897
3966	RKH	0.606424	37.1506	9.94465	-23.6367	6.01263	-80.3728	4.35645
3967	RKH	0.39772	37.1436	12.2286	-24.3627	5.49773	-86.823	3.54213
3968	RKH	0.692767	37.3258	11.927	-23.8791	4.8607	-89.5306	3.64951
2896ave	RKH	0.67287	40.2255	11.0491	-23.1093	3.86601	-92.4767	4.24917
2950ave	RKH	-	45.1392	13.7304	-23.8592	2.39602	-102.767	3.83627
4120ave	RKH	0.679143	45.1392	13.7304	-24.0263	3.68631	-104.41	4.23602
3959	YCG	0.723498	38.3264	13.1887	-23.5344	6.2252	-84.9791	3.38884
4058	YCG	-	31.2639	10.8207	-24.0295	7.01748	-104.449	3.36935
4062	YCG	0.923289	41.2076	14.5116	-23.794	4.34047	-97.6293	3.31146
4063	YCG	-	35.7025	12.3517	-23.6394	4.95133	-89.2112	3.37075
4064	YCG	0.858782	40.0131	13.8235	-23.7291	5.92126	-88.0426	3.37552
4065	YCG	0.969741	39.9136	13.8923	-24.0905	7.21996	-98.8455	3.35046
4066	YCG	0.818061	40.8469	13.7408	-24.359	7.88952	-89.0876	3.4666
4068	YCG	0.867439	40.3714	13.5163	-23.4934	8.69935	-88.0168	3.48315
4069	YCG	0.602854	40.1632	13.6404	-24.1654	6.21028	-89.3576	3.43365
4070	YCG	0.735388	39.869	13.8187	-23.5627	6.2594	-84.9658	3.36452
4072	YCG	0.946524	39.4154	13.8977	-23.9745	5.55465	-98.2875	3.30735
4073	YCG	0.595995	33.3766	8.89066	-24.9512	6.64135	-92.2569	4.3779
4074	YCG	-	41.5064	13.4715	-23.9694	7.29879	-100.398	3.593
4075	YCG	0.938515	40.2446	12.2679	-24.5175	4.86465	-90.057	3.82556
4077	YCG	0.846687	39.6551	13.6516	-23.7698	5.61782	-86.458	3.38743
4079	YCG	0.807964	41.0278	13.6112	-23.2185	7.09414	-91.671	3.5151
4080	YCG	0.817204	41.7016	13.8472	-23.8538	7.5669	-97.4463	3.51195
4095	YCG	0.742914	35.4261	12.155	-25.2341	9.63294	-99.5321	3.39881
4060a	YCG	-	38.9944	13.7758	-24.2405	6.46559	-95.8102	3.30098
4060b	YCG	0.902435	39.9165	13.3269	-25.293	11.029	-102.603	3.49285
4078ave	YCG	0.845665	44.2042	13.8981	-24.2425	7.44851	-93.1727	3.71214
4081	YLB	0.556407	40.1605	13.5516	-23.6607	6.87021	-88.2244	3.45593
4082	YLB	0.604467	37.1444	12.2035	-24.085	8.41753	-85.0989	3.5495
4083	YLB	0.617987	36.6792	12.7326	-24.055	7.02657	-83.1766	3.35938
4085	YLB	0.714933	37.6178	13.1583	-23.7795	4.30357	-89.9955	3.33387
4086	YLB	0.657459	38.7156	13.457	-23.8765	6.41282	-93.2313	3.35503
4088	YLB	0.710468	40.3887	14.3221	-24.1084	7.94151	-97.1599	3.2886
4089	YLB	0.818354	39.3424	13.7485	-24.0824	8.08069	-93.6504	3.33704
4092	YLB	0.759134	40.8744	14.0779	-23.9876	8.77939	-91.9806	3.38588
4093	YLB	-	39.3223	13.9683	-24.0874	7.5339	-101.404	3.28287
4094	YLB	0.946754	39.8789	13.1501	-23.938	7.56515	-91.8931	3.53648
4087ave	YLB	-	39.4496	12.9643	-24.0252	7.15911	-89.6178	3.54879
4121	YSG	0.808316	39.8492	12.9709	-24.5419	7.14555	-95.1853	3.58265
4123	YSG	0.808451	40.0208	12.5442	-24.1716	3.27242	-117.406	3.72047
4124	YSG	0.80366	39.4558	12.5962	-24.1231	6.90012	-96.9949	3.65281
4125	YSG	0.624429	39.5254	13.1424	-23.3583	6.3846	-88.7602	3.50718
				max	-22.2043	11.1064	-77.7891
				min	-25.293	0.389398	-118.336
				range	-3.08874	-10.717	-40.5466
