# Supplementary material for: Provenancing Archaeological Wool Textiles from Medieval Northern Europe by Light Stable Isotope Analysis (δ13C, δ15N, δ2H)
Source: PLoS One. 2016 Oct 20;11(10):e0162330. doi: 10.1371/journal.pone.0162330 (PMC5072590; doi:10.1371/journal.pone.0162330)
Supplement: S3 Table — (XLSX) [file pone.0162330.s003.xlsx]

## Sheet: Holstein2016S3table
ID	Site	C% mass	N% mass	δ13C/‰	δ15N/‰	δ2H/‰	C:Natom
4120-I	RKH	39.0389	10.9402	-24.0273	3.4798	-105.4	4.16314
4120-II	RKH	38.899	10.8982	-23.9774	3.5207	-104.501	4.16418
4120-III	RKH	39.171	11.0631	-23.876	3.64613	-106.775	4.13082
4120-IV	RKH	37.723	10.6478	-23.9509	3.53699	-101.597	4.13326
4120-V	RKH	38.1037	10.698	-24.0082	3.62293	-104.828	4.15537
4120-VI	RKH	33.1898	8.80635	-24.1325	3.63004	-102.697	4.39699
4120-VII	RKH	35.0194	9.56993	-24.1243	4.04668	-107.131	4.26921
4120-VIII	RKH	36.255	9.91319	-24.0066	3.82482	-101.54	4.26678
4120-IX	RKH	32.8736	8.62942	-24.1332	3.86872	-105.219	4.44439
2896-I	RKH	38.3591	10.3292	-23.1539	3.9163	-92.8724	4.33072
2896-II	RKH	40.1972	11.2096	-23.2149	3.56947	-93.5998	4.18363
2896-III	RKH	42.1201	11.6084	-22.959	4.11226	-90.958	4.23315
4078-I	YCG	42.0875	14.1118	-24.9082	7.7264	-94.0718	3.47798
4078-II	YCG	46.007	14.0599	-23.8858	7.74015	-93.5456	3.81759
4078-III	YCG	44.5181	13.5225	-23.9337	6.87897	-91.9005	3.84085
4087-I	YLB	39.847	12.9008	-24.0835	7.02889	-87.1481	3.60192
4087-II	YLB	39.0523	13.0278	-23.967	7.28933	-92.0875	3.49567
2950-I	RKH	44.5786	13.278	-23.5587	2.74686	-104.681	3.91687
2950-II	RKH	43.8827	13.4714	-23.8508	2.25657	-103.659	3.8004
2950-III	RKH	50.0196	15.341	-23.8294	2.37489	-105.399	3.80394
2950-IV	RKH	44.942	13.7382	-23.7261	2.3697	-98.9761	3.81654
2950-V	RKH	44.7771	13.8275	-23.8372	2.41463	-105.54	3.77798
2950-VI	RKH	44.4906	13.6227	-23.7999	2.03104	-102.394	3.81022
2950-VII	RKH	44.6453	13.6068	-23.9552	2.29393	-99.6758	3.82796
2950-VIII	RKH	44.3612	13.3209	-24.0051	2.62257	-98.7858	3.88522
2950-IX	RKH	44.595	13.4982	-24.0837	2.78893	-101.333	3.85442
2950-X	RKH	45.1001	13.599	-23.9459	2.06104	-107.228	3.86917
		δ13C/‰		δ15N/‰		δ2H/‰		C:Natom
ID	Site	Mean	1s	Mean	1s	Mean	1s	Mean	1s
4120ave	RKH	-24.0263	0.0892254	3.68631	0.188245	-104.41	2.05845	4.23602	0.117249
2896ave	RKH	-23.1093	0.133642	3.86601	0.274868	-92.4767	1.36463	4.24917	0.0748421
4078ave	YCG	-24.2425	0.576931	7.44851	0.493278	-93.1727	1.1327	3.71214	0.203123
4087ave	YLB	-24.0252	0.0823742	7.15911	0.184159	-89.6178	3.49263	3.54879	0.0751286
2950ave	RKH	-23.8592	0.149588	2.39602	0.259393	-102.767	2.99903	3.83627	0.04368
