# Supplementary material for: Provenancing Archaeological Wool Textiles from Medieval Northern Europe by Light Stable Isotope Analysis (δ13C, δ15N, δ2H)
Source: PLoS One. 2016 Oct 20;11(10):e0162330. doi: 10.1371/journal.pone.0162330 (PMC5072590; doi:10.1371/journal.pone.0162330)
Supplement: S4 Table — (XLSX) [file pone.0162330.s004.xlsx]

## Sheet: Holstein2016S4table
ID	Site	Context/Code	Phase	Date	Element	Age	Collagen % yield (good quality, after ultrafiltration)	C% mass	N% mass	δ13C/‰	δ15N/‰	δ2H/‰	C:Natom	Comment
4307	HSS	H LW 20 228		Mid-late 7th cent	mandible	Adult	2.338	42.5216	15.0537	-21.3458	12.5815	-54.9035	3.29544
4308	HSS	H LW 7a 331		Mid-late 7th cent	mandible	Adult	2.987	44.3868	15.8152	-21.0311	10.2847	-42.5995	3.27436
4309	HSS	H Mv 27 334		Mid 7th cent	mandible	Adult	2.026	44.5257	15.8766	-20.3481	10.8963	-46.3517	3.2719
4310	HSS	H Mv 27 334		Mid 7th cent	mandible	Adult	2.625	43.9461	15.7183	-20.7507	11.0935	-39.7275	3.26183
4311	HSS	H LW 4h 230		Mid-late 7th cent	mandible	Adult	3.268	43.107	15.2522	-20.3813	12.224	-35.4431	3.29733
4312	HSS	H LVV 1e 222		Mid 7th cent	mandible	Adult	4.563	44.2033	15.8613	-20.3057	10.1016	-40.7115	3.25135
4313	HSS	H 63 P 29a		7th-8th cent	mandible	Adult	2.143	44.3005	15.7006	-20.8689	8.07067	-44.8714	3.29185
4555-1	NBG	BG76IJ	Phase<7	12th cent -15th cent	metapodial	Adult	5.356	44.2043	15.6352	-21.5435	5.82819	-60.1607	3.29844
4555-10	NBG	BG76IE	Phase 8	Early 16th cent	metapodial	Adult	5.681	73.4935	26.8468	-21.9971	5.86063	-56.5059	3.19377
4555-11	NBG	BG76IE	Phase 8	Early 16th cent	metapodial	Adult	NA	43.836	15.433	-21.992	4.99069	-60.6258	3.31382
4555-12	NBG	BG76IE	Phase 8	Early 16th cent	metapodial	Adult	NA	43.5069	15.5597	-21.2581	5.56327	-46.5265	3.26214
4555-13	NBG	BG75DL	Phase 8	Early 16th cent	metapodial	Adult	NA	44.5168	16.1097	-21.9806	3.15236	-57.0572	3.22392
4555-14	NBG	BG76IM	Phase 8	Early 16th cent	metapodial	Adult	NA	43.8349	15.7457	-21.8373	8.21535	-63.7792	3.24791
4555-2	NBG	BG76IJ	Phase<7	12th cent -15th cent	metapodial	Adult	6.546	43.8184	15.8158	-20.9685	4.90047	-55.6912	3.23231
4555-3	NBG	BG76IJ	Phase<7	12th cent -15th cent	metapodial	Adult	6.423	44.3165	15.9066	-21.4515	5.36849	-59.7024	3.25038
4555-4	NBG	BG76IJ	Phase<7	12th cent -15th cent	tibia	Adult	6.532	44.5343	16.1667	-19.8788	10.8642	-18.5275	3.21381
4555-5	NBG	BG76IL	Phase<7	12th cent -15th cent	metapodial	Adult	6.366	43.9579	15.7248	-21.8793	6.18232	-55.1179	3.26136
4555-6	NBG	BG76II	Phase<7	12th cent -15th cent	metapodial	Adult	5.601	44.3095	15.9012	-21.9108	4.73461	-47.95	3.25098
4555-7	NBG	BG76II	Phase<7	12th cent -15th cent	metapodial	Adult	3.929	44.9194	16.1639	-21.8868	7.28418	-58.5761	3.24215
4555-8	NBG	BG76II	Phase<7	12th cent -15th cent	metapodial	Adult	4.744	44.3684	15.9238	-21.8748	5.41793	-50.6867	3.25067
4555-9	NBG	BG76II	Phase<7	12th cent -15th cent	metapodial	Adult	4.61	43.6506	15.7884	-21.6727	6.81812	-52.9798	3.22551
4551	NQS	639	Phases 2-3	13th cent	cranium	Adult	5.216	43.572	14.9187	-21.9486	7.37532	-52.3305	3.40741
4552	NQS	642	Phases 2-3	13th cent	mandible	Adult	3.043	43.7379	15.2461	-22.0659	8.62636	-64.0892	3.34693
4554	NQS	648	Phases 2-3	13th cent	metapodial	Adult	5.339	43.4676	15.525	-21.4332	7.09333	-52.8598	3.26648
4548-1	NQS	553	Phases 2-3	13th cent	metapodial	Adult	5.701	44.424	15.8971	-21.8916	8.03756	-60.1874	3.26022
4548-2	NQS	553	Phases 2-3	13th cent	metapodial	Adult	3.948	44.6474	15.8922	-22.2646	10.9819	-62.9159	3.27761
4549-1	NQS	630	Phases 2-3	13th cent	vertebra	Adult	4.251	44.5644	15.9056	-20.0479	11.3232	-13.2615	3.26878
4549-2	NQS	630	Phases 2-3	13th cent	vertebra	Adult	4.655	44.4493	16.0072	-21.8248	7.77265	-64.5101	3.23964
4550-1	NQS	635	Phases 2-3	13th cent	cranium	Adult	2.914	43.424	15.5299	-21.477	10.0469	-62.4329	3.26218
4550-2	NQS	635	Phases 2-3	13th cent	metapodial	Adult	4.506	45.6884	16.0359	-22.257	8.10998	-61.394	3.324
4550-3	NQS	635	Phases 2-3	13th cent	metapodial	Adult	3.66	44.4385	15.928	-22.2668	7.15298	-62.9466	3.25495
4550-4	NQS	635	Phases 2-3	13th cent	humerus	Adult	4.593	44.5027	15.8813	-21.9391	5.75489	-63.6907	3.26924
4550-5	NQS	635	Phases 2-3	13th cent	humerus	Adult	5.136	44.1368	15.8196	-21.7956	6.05119	-64.7888	3.25501
4553-1	NQS	644	Phases 2-3	13th cent	humerus	Adult	3.738	43.6336	15.3526	-21.8416	7.58467	-54.2707	3.31577
4553-2	NQS	644	Phases 2-3	13th cent	long bone	Adult	2.714	44.5556	15.2496	-21.5932	8.18334	-64.3426	3.40872
4553-3	NQS	644	Phases 2-3	13th cent	long bone	Adult	4.434	44.8747	16.0922	-21.6028	8.29185	-59.0699	3.25336
3598	RKH	RKH-1988-214-102	5.1	17th-19th cent	phalange	Adult	1.12316							Rejected
3600	RKH	RKH-1988-214-418	6-7	19th cent onwards	metapodial	Juvenile	7.49386	43.0521	15.2935	-21.7996	3.2961	-69.4041	3.28424
3603	RKH	RKH-1989-33-219	5	17th-19th cent	metapodial	Adult	5.37847	43.7232	15.3366	-21.7845	2.53506	-68.8535	3.32605
3607	RKH	RKH-2000-6-54 CL430	2	12th-14th cent	metatarsal	Adult	1.90284	43.9115	15.1302	-21.8509	3.28439	-72.3564	3.38596
3608	RKH	RKH-2000-6-155 [157]	4	16th-17th cent	humerus	Adult	10.2218	44.1498	15.9705	-21.3352	6.43372	-56.1282	3.2252
3610	RKH	RKH-2000-6-M2	6-7	19th cent onwards	long bone	Juvenile	6.68616	45.171	16.3114	-21.3761	3.8177	-69.1883	3.23084
3611	RKH	RKH-2000-6-M7	6-7	19th cent onwards	mandible	Adult	9.35032	43.7351	15.6875	-21.3524	3.62156	-73.4238	3.25254
3612	RKH	RKH-2000-6-M13	6-7	19th cent onwards	metapodials	Adult	15.8652	44.4826	16.2673	-21.039	2.74385	-71.4064	3.19022
2907a+b	RKH	RKH-2000 CL419 FB243	2?	1200-1400	radius	Adult	4.88983	40.9724	9.36452	-23.1688	4.33387		5.05618	Rejected
2907c	RKH	RKH-2000 CL419 FB244	2?	1200-1400	radius	Adult	39.9532							Rejected
2908a	RKH	RKH 2000-FB246 CL466	2.2	1200-1400	?	?	0.734328							Rejected
2908b	RKH	RKH 2000-FB246 CL467	2.3	1200-1400	?	?	0.784332							Rejected
4168	YCG	4620 or 9224	/	mid 13th cent	mandible	7-9 yrs	7.43	40.94	15.075	-21.9214	6.22003	-57.0268	3.16839
4169	YCG	4620 or 9224	/	mid 13th cent	mandible	3 yrs	4.27	41.205	15.1	-22.1756	8.93278	-59.0016	3.18361
4170	YCG	4620 or 9224	/	mid 13th cent	mandible	8-10 yrs	4.77	41.465	15.2	-22.1929	6.64262	-73.022	3.18305
4171	YCG	4620 or 9224	/	mid 13th cent	mandible	3 yrs	4.44	40.875	14.935	-22.2263	5.50895	-56.4445	3.19313
4172	YCG	4620 or 9224	/	mid 13th cent	mandible	4-5 yrs	5.95	41.15	15.13	-21.691	6.591	-53.5323	3.17304
4173	YCG	4620 or 9224	/	mid 13th cent	mandible	2 yrs	3.11	41.13	15.225	-22.4715	6.42966	-67.8518	3.15175
4174	YCG	4620 or 9224	/	mid 13th cent	mandible	4-6 yrs	4.04	41.97	15.235	-22.3076	9.333	-67.3462	3.21404
4175	YCG	4620 or 9224	/	mid 13th cent	mandible	2-3 yrs	2.86	41.82	15.17	-21.8697	6.57158	-65.4697	3.21671
4176	YCG	4620 or 9224	/	mid 13th cent	mandible	3 yrs	4.39	42.295	15.615	-21.8819	8.18312	-58.0752	3.16055
4177	YCG	4620 or 9224	/	mid 13th cent	mandible	18 mnths	3.41	41.545	15.27	-21.2765	3.85076	-47.5317	3.17573
4178	YCG	4620 or 9224	/	mid 13th cent	mandible	4-5 yrs	4.77	44.375	16.205	-22.166	9.31369	-61.303	3.19527
4179	YCG	4620 or 9224	/	mid 13th cent	mandible	6-18 mnths	4.68	44.51	16.385	-21.7885	9.09193	-60.026	3.16976
4180	YCG	4620 or 9224	/	mid 13th cent	mandible	3-4 yrs	4.64	47.005	17.25	-21.2477	6.17938	-64.5599	3.17913
4181	YCG	4620 or 9224	/	mid 13th cent	mandible	2 yrs	5.75	49.33	17.57	-22.0378	8.48522	-55.3566	3.28401
4182	YCG	4620 or 9224	/	mid 13th cent	mandible	1-2 mnths	4.59	48.025	17.555	-22.0968	5.19606	-51.7449	3.19338
4183	YCG	4620 or 9224	/	mid 13th cent	mandible	2 mnths	5.09	50.73	18.105	-20.839	5.34088	-42.5759	3.28056
