# Supplementary material for: Provenancing Archaeological Wool Textiles from Medieval Northern Europe by Light Stable Isotope Analysis (δ13C, δ15N, δ2H)
Source: PLoS One. 2016 Oct 20;11(10):e0162330. doi: 10.1371/journal.pone.0162330 (PMC5072590; doi:10.1371/journal.pone.0162330)
Supplement: S5 Table — (XLSX) [file pone.0162330.s005.xlsx]

## Sheet: Holstein2016S5table
ID	Site	[Asx]	[Glx]	[Ser]	[L-Thr]	[L-His]	[Gly]	[L-Arg]	[Ala]	[Tyr]	[Val]	[Phe]	[Leu]	[Ile]	[Asx]%	[Glx]%	[Ser]%	[L-Thr]%	[L-His]%	[Gly]%	[L-Arg]%	[Ala]%	[Tyr]%	[Val]%	[Phe]%	[Leu]%	[Ile]%	Asx D/L	Glx D/L	Ser D/L	Arg D/L	Ala D/L	Tyr D/L	Val D/L	Phe D/L	Leu D/L	Ile D/L
2894	RKH	-	-	-	-	-	-	-	-	-	-	-	-	-	-	-	-	-	-	-	-	-	-	-	-	-	-	-	-	-	-	-	-	-	-	-	-
2895	RKH	171484	464286	62260.9	111233	15726.2	245372	159075	245516	41937.3	245382	90897.3	322143	153080	0.0736491	0.199402	0.0267398	0.0477723	0.00675411	0.105383	0.0683199	0.105445	0.0180113	0.105387	0.0390386	0.138354	0.0657451	0.774624	0.182732	0.226817	0.143585	0.188541	0.116398	0.0572917	0.113039	0.088373	0.0604173
3961	RKH	557081	1.1011e+06	792386	551350	47065.6	549354	489686	436329	202187	541066	186070	731460	342635	0.0853401	0.168679	0.121387	0.0844623	0.00721006	0.0841565	0.0750158	0.0668419	0.0309734	0.0828868	0.0285044	0.112054	0.0524889	0.102979	0.0465289	0.0110371	0.0413572	0.0373197	0.0415944	0.016714	0.0378287	0.0411216	0.027658
2896a	RKH	309001	736220	326797	292698	34954.6	260887	248755	297418	19449.6	312631	102436	480570	198981	0.0853405	0.203331	0.0902556	0.0808379	0.00965383	0.0720524	0.0687016	0.0821415	0.00537164	0.0863431	0.028291	0.132725	0.0549551	0.143737	0.0580634	0.0247818	0.0768508	0.030893	0.0663139	0.0226907	0.0493039	0.0463339	0.031421
2896b	RKH	290741	704312	316044	291700	35860.1	276102	243033	281374	19106.9	309553	101051	456958	193727	0.0826071	0.200113	0.0897966	0.0828797	0.0101888	0.0784478	0.0690521	0.0799458	0.00542878	0.0879521	0.0287112	0.129834	0.0550429	0.153108	0.063231	0.0229944	0.0779838	0.0336315	0.0665993	0.0248777	0.0510827	0.0507291	0.0395211
2897	RKH	285042	663906	331088	292612	35978.5	276025	262646	275378	7603.71	279518	89936.7	423740	173076	0.0839211	0.195465	0.0974778	0.0861499	0.0105927	0.0812663	0.0773272	0.0810759	0.00223866	0.0822946	0.0264788	0.124756	0.0509563	0.145946	0.0475113	0.0987742	0.048776	0.0352221	0.245221	0.0212148	0.0422896	0.0354165	0.0223349
2898	RKH	307837	747563	423042	397737	47458.5	328330	335631	299923	85716.3	351016	102570	460728	209689	0.0751329	0.182455	0.10325	0.0970743	0.0115831	0.0801345	0.0819165	0.0732012	0.0209205	0.0856712	0.0250339	0.112448	0.051178	0.160747	0.0579086	0.104807	0.0597412	0.0411512	0.0596066	0.0227479	0.0455255	0.0419271	0.0218223
2899a	RKH	310418	722696	324364	302192	36413.9	252137	269283	292283	20374.5	302762	86071.3	449223	187914	0.0872908	0.203225	0.0912126	0.0849777	0.0102397	0.0709021	0.0757237	0.0821914	0.00572939	0.085138	0.0242036	0.126323	0.0528422	0.126733	0.0551703	0.111187	0.0780635	0.0469004	0.0758491	0.0232093	0.0463341	0.0441466	0.0258346
2899b	RKH	330156	735098	316216	269611	32696.7	246807	265079	316717	24422.9	314266	92503.2	477725	200432	0.0911598	0.202969	0.0873107	0.0744426	0.00902792	0.0681461	0.0731913	0.087449	0.00674343	0.0867724	0.0255412	0.131905	0.0553416	0.140278	0.0648474	0.113109	0.0874784	0.0656867	0.0565659	0.0249689	0.0505342	0.0521038	0.0266713
2901	RKH	269722	616128	281764	254544	29883	222578	238195	256005	24039.5	262339	79100.4	395942	166821	0.0870897	0.19894	0.0909779	0.0821889	0.00964882	0.0718675	0.0769101	0.0826607	0.00776202	0.0847058	0.0255405	0.127844	0.0538643	0.139471	0.0603044	0.128238	0.0711961	0.0667965	0.078408	0.0237383	0.0487603	0.0483435	0.0226496
3962	RKH	457165	1.12151e+06	585635	569889	52979.7	426242	475174	446155	90667.6	500653	135661	674474	315958	0.078119	0.191641	0.100072	0.0973809	0.009053	0.0728349	0.0811963	0.0762376	0.015493	0.0855501	0.0231813	0.115252	0.0539899	0.160059	0.0544792	0.10128	0.0446482	0.0876886	0.0465084	0.0181977	0.0457765	0.0488192	0.0269931
3963	RKH	606715	1.3411e+06	537584	469329	53174.2	381719	495403	500026	71788.8	528207	151303	867139	351885	0.0954649	0.211018	0.0845873	0.0738476	0.00836681	0.0600624	0.0779502	0.0786777	0.0112958	0.0831119	0.023807	0.136442	0.0553682	0.128972	0.0507288	0.106114	0.0513202	0.0520713	0.0337057	0.0155026	0.0420725	0.0434243	0.0252361
3964	RKH	564667	1.26459e+06	576274	527060	46964.3	408660	501769	469667	64224.5	529357	153043	804330	348574	0.0902141	0.202038	0.0920686	0.0842059	0.00750326	0.0652897	0.0801653	0.0750365	0.0102608	0.0845728	0.0244509	0.128504	0.05569	0.130209	0.0522355	0.101729	0.0471085	0.0478015	0.0672587	0.0159212	0.0416949	0.0439371	0.0252178
3965	RKH	572143	1.17366e+06	966141	655865	73406.7	901367	586344	496297	241975	595045	220247	804483	347192	0.0749451	0.153738	0.126555	0.0859118	0.00961555	0.11807	0.0768052	0.06501	0.0316963	0.077945	0.0288502	0.105379	0.0454788	0.109463	0.045442	0.0366322	0.04932	0.0558512	0.0429449	0.01469	0.0367787	0.0544697	0.0219593
2902	RKH	282726	600855	388792	303054	29693.8	335032	260212	262102	21257.6	277686	107377	394529	174686	0.0822355	0.174768	0.113086	0.0881482	0.00863695	0.0974497	0.0756871	0.0762366	0.00618313	0.0807697	0.0312323	0.114755	0.0508105	0.118855	0.0570359	0.0239918	0.0629506	0.0654798	0.0950056	0.0210677	0.0430989	0.0482624	0.0192924
2903	RKH	410144	872763	573511	422098	52226.5	476688	359288	381894	12910	409773	150685	588636	250008	0.0826799	0.175938	0.115613	0.0850896	0.0105282	0.0960943	0.072428	0.076985	0.0026025	0.0826051	0.0303763	0.118662	0.0503986	0.107676	0.0486134	0.0269524	0.0612013	0.0405274	0.0440882	0.0197597	0.0413547	0.0387911	0.0181766
2904	RKH	318499	660051	409529	310470	37688.9	293717	292857	276844	48701	306497	100473	444075	186173	0.0864178	0.17909	0.111117	0.0842391	0.0102261	0.0796936	0.0794603	0.0751156	0.013214	0.0831612	0.0272612	0.12049	0.0505139	0.112925	0.0493951	0.0230779	0.0610413	0.0362184	0.0480118	0.0223548	0.0409996	0.0419789	0.00762572
2950ave	RKH	-	-	-	-	-	-	-	-	-	-	-	-	-	-	-	-	-	-	-	-	-	-	-	-	-	-	-	-	-	-	-	-	-	-	-	-
3966	RKH	434183	1.05665e+06	519396	467132	29648.6	446690	377536	407482	72015.8	484163	149958	649869	297984	0.080513	0.195941	0.0963144	0.0866229	0.0054979	0.0828323	0.0700086	0.0755616	0.0133543	0.0897809	0.0278075	0.120509	0.0552567	0.149547	0.0593108	0.0249945	0.0494979	0.0640178	0.061011	0.0192015	0.0462595	0.0473566	0.0315938
3967	RKH	560285	1.2476e+06	815237	670532	0	773534	551191	533929	85818.3	575945	191943	827995	366948	0.077807	0.173255	0.113212	0.093117	0	0.107421	0.0765441	0.0741469	0.0119176	0.0799816	0.0266552	0.114984	0.0509582	0.107846	0.0488423	0.0206167	0.0494337	0.0563904	0.060898	0.0147694	0.0406035	0.0488355	0.0184215
3968	RKH	566309	1.33033e+06	784307	672739	0	653376	547148	571111	52207.6	613868	183094	851947	389459	0.0784808	0.184362	0.108692	0.0932301	0	0.0905467	0.0758254	0.0791462	0.00723507	0.0850715	0.0253737	0.118065	0.0539723	0.114051	0.0522652	0.0198592	0.0514794	0.0612413	0.0505737	0.0154137	0.0403986	0.0350711	0.0185336
2906	RKH	751203	1.65052e+06	1.12366e+06	796828	76955.4	865716	719908	677968	115425	772220	237721	1.06977e+06	481319	0.0804354	0.17673	0.120316	0.0853208	0.00824004	0.0926969	0.0770845	0.0725937	0.0123592	0.0826859	0.025454	0.114546	0.0515375	0.100896	0.0482839	0.0132408	0.0411951	0.0680718	0.212853	0.0153982	0.0485094	0.0454194	0.0343958
4120-IX	RKH	324924	719876	278546	235366	30464.7	218502	261638	300336	36981.2	289784	85221.9	481497	199786	0.0938295	0.207881	0.0804368	0.0679674	0.00879739	0.0630975	0.0755539	0.0867291	0.0106792	0.0836818	0.0246098	0.139043	0.057693	0.137655	0.049322	0.0900762	0.0548244	0.0635946	0.0385537	0.0158769	0.0432552	0.03515	0.0103986
4120-V	RKH	221447	502522	207101	171911	21618	135749	187554	194800	24792	201573	56033.5	326491	138990	0.0926332	0.210209	0.086632	0.0719117	0.00904299	0.056785	0.0784553	0.0814866	0.0103707	0.0843198	0.0234393	0.136574	0.0581405	0.127945	0.0507078	0.106306	0.0511285	0.0426852	0.0357361	0.0147502	0.0476886	0.0323935	0.0163857
4120-VIII	RKH	208711	472641	190428	165368	20620.3	135453	175477	192601	27300.5	189621	52624.4	314163	132100	0.0916563	0.207562	0.0836269	0.0726218	0.00905547	0.0594848	0.0770615	0.0845813	0.0119891	0.0832725	0.0231102	0.137966	0.0580121	0.134016	0.048434	0.0989397	0.0571573	0.0667908	0.0505144	0.0165523	0.0402674	0.0388334	0.0406514
4329	HSS	545324	1.0802e+06	758776	557856	49283.3	568041	520570	465839	104106	535806	175285	748568	351223	0.084404	0.167191	0.117442	0.0863437	0.00762795	0.0879202	0.0805727	0.0721015	0.0161133	0.0829308	0.0271303	0.115862	0.0543615	0.126581	0.0438041	0.0523361	0.0387507	0.0418175	0.0464249	0.0176644	0.0378141	0.0369497	0.0278957
4330	HSS	327701	671265	555866	369597	30736.5	375983	329687	286013	71204.9	346873	109216	465248	223114	0.0787269	0.161265	0.133541	0.0887919	0.00738413	0.0903262	0.079204	0.0687118	0.0171063	0.0833328	0.026238	0.111771	0.0536009	0.110499	0.0370952	0.0424995	0.0365799	0.0240399	0.0468599	0.0158108	0.034908	0.0332957	0.0278098
4331	HSS	483423	975737	702303	484282	33101.3	461485	468299	437424	76446.3	488323	148055	666664	315534	0.0842042	0.169957	0.122329	0.0843538	0.00576569	0.080383	0.0815699	0.076192	0.0133157	0.0850578	0.0257888	0.116122	0.0549608	0.123467	0.0429615	0.058675	0.0409527	0.0589303	0.049441	0.0157203	0.0339299	0.0368845	0.0275525
4332	HSS	305825	585054	387906	280111	18006.8	257264	272372	252957	66537.4	291001	99547.8	403732	187486	0.0897428	0.171681	0.113829	0.0821969	0.00528401	0.0754927	0.079926	0.0742288	0.0195251	0.0853925	0.0292118	0.118473	0.0550167	0.135876	0.040559	0.063214	0.0424135	0.0284478	0.0385178	0.0157247	0.0410376	0.0319875	0.0104418
4333	HSS	548260	1.08643e+06	761234	518728	61547.4	513641	551217	478214	105733	551907	172367	775069	365164	0.0844841	0.167413	0.117302	0.0799333	0.00948414	0.0791495	0.0849397	0.0736904	0.0162929	0.0850461	0.0265608	0.119434	0.0562699	0.106678	0.0416306	0.0446653	0.0369611	0.0358115	0.0395382	0.0198139	0.0407992	0.0332233	0.0252629
4334	HSS	469779	969683	747957	510511	61523.4	543863	487387	427185	62568.8	501856	152006	673252	329511	0.0791262	0.163327	0.125981	0.0859868	0.0103626	0.0916045	0.0820921	0.071952	0.0105387	0.084529	0.0256028	0.113398	0.0555005	0.111335	0.0434262	0.0488506	0.0419545	0.0473849	0.0472975	0.0203296	0.0435861	0.0489176	0.0405549
4335	HSS	444232	920823	667107	471594	41896	425139	455260	399167	63022.4	464647	133544	621837	304602	0.0820696	0.170117	0.123245	0.0871246	0.00774007	0.0785422	0.084107	0.0737441	0.0116431	0.0858411	0.0246715	0.114881	0.0562737	0.120362	0.0441908	0.0465405	0.0427274	0.05419	0.051503	0.0175829	0.038327	0.0366046	0.0287774
4336	HSS	474626	978921	770554	548008	60354.5	520343	499332	421229	77793.2	513512	153078	642754	320602	0.0793543	0.163669	0.128831	0.0916232	0.0100909	0.0869978	0.083485	0.0704266	0.0130065	0.0858557	0.0255935	0.107464	0.0536024	0.122058	0.0418547	0.055205	0.0401576	0.0386273	0.0425329	0.015813	0.0392083	0.0309882	0.00916045
4337	HSS	540438	1.08948e+06	775759	520707	57145.3	490887	553240	478902	96745	526506	160813	717660	352351	0.084966	0.171285	0.121962	0.0818639	0.00898421	0.0771758	0.0869787	0.0752914	0.01521	0.0827757	0.0252826	0.112828	0.0553955	0.122482	0.0435606	0.0574349	0.0428981	0.0499546	0.0485785	0.0156668	0.039913	0.0328931	0.00930367
4338	HSS	520535	1.04701e+06	734739	510830	50836	479221	524958	438024	40858	505190	160580	698092	332370	0.0861351	0.173252	0.12158	0.0845291	0.00841204	0.0792986	0.086867	0.0724817	0.00676095	0.0835959	0.0265718	0.115516	0.0549986	0.106009	0.0390807	0.0460468	0.0368619	0.0294048	0.0436687	0.0168553	0.0354737	0.0304523	0.00701653
3959	YCG	654877	1.35085e+06	1.02749e+06	749544	81153.9	843349	666921	555807	167180	681003	221953	916709	414821	0.0786012	0.162134	0.123323	0.0899635	0.00974044	0.101222	0.0800467	0.0667103	0.0200656	0.0817369	0.0266398	0.110027	0.0497886	0.113269	0.0452056	0.0518696	0.0429786	0.0551868	0.0395717	0.0155886	0.071957	0.0521521	0.0227907
4058	YCG	495785	1.04187e+06	835252	526073	58273.4	576499	505116	427897	92754.3	514602	163332	689819	320807	0.0793499	0.16675	0.133681	0.0841975	0.00932661	0.0922682	0.0808435	0.0684845	0.0148453	0.0823616	0.0261412	0.110405	0.0513449	0.112717	0.0426877	0.0802066	0.0394911	0.0480459	0.0501326	0.0154808	0.0396345	0.0394843	0.0220572
4060a	YCG	581997	1.24517e+06	966884	738548	0	879312	610354	527550	140927	629516	205845	844420	385412	0.0750389	0.160544	0.124664	0.0952235	0	0.113373	0.0786951	0.0680189	0.0181702	0.0811657	0.0265404	0.108874	0.0496925	0.118774	0.0456743	0.0581722	0.0409041	0.0403317	0.0339162	0.0145977	0.0425767	0.0477202	0.0168872
4060b	YCG	655452	1.31885e+06	932123	700689	0	846386	615769	582253	134188	653701	222373	913330	417713	0.082005	0.165004	0.11662	0.0876647	0	0.105893	0.0770402	0.072847	0.0167885	0.0817859	0.0278216	0.114269	0.052261	0.120283	0.0458825	0.0529638	0.0442207	0.0413327	0.0412167	0.0153406	0.0437774	0.0364323	0.0178352
4062	YCG	929959	1.87125e+06	1.35092e+06	958467	106855	1.07697e+06	920462	760344	210853	921970	299988	1.25259e+06	570920	0.0827989	0.166606	0.120279	0.0853371	0.0095138	0.0958881	0.0819533	0.0676972	0.0187733	0.0820875	0.0267094	0.111524	0.0508319	0.10909	0.0443781	0.0458983	0.0408883	0.0378644	0.0403774	0.0160991	0.0408811	0.0425661	0.0231794
4063	YCG	542660	1.13735e+06	846831	641020	0	814441	568326	485410	183435	565318	188120	776088	350107	0.0764407	0.16021	0.119287	0.0902959	0	0.114724	0.0800561	0.0683762	0.0258391	0.0796322	0.0264991	0.109322	0.0493171	0.117909	0.0458016	0.0521702	0.039613	0.0400126	0.038794	0.0136498	0.0400179	0.0459909	0.0153446
4064	YCG	559658	1.15665e+06	895363	658942	0	845381	567986	508365	147777	578049	202677	796740	360371	0.0768977	0.158925	0.123024	0.0905394	0	0.116156	0.078042	0.0698499	0.0203047	0.0794246	0.0278481	0.109473	0.0495154	0.116499	0.0453613	0.0561903	0.0403575	0.0440109	0.0371433	0.014293	0.0415781	0.0476147	0.0180313
4065	YCG	673419	1.35272e+06	1.02023e+06	718592	82303.5	859248	681531	560140	186606	679308	229681	916203	420990	0.0803509	0.161404	0.121732	0.0857409	0.00982028	0.102524	0.0813188	0.0668347	0.0222654	0.0810536	0.027405	0.109319	0.0502316	0.111852	0.0446908	0.0474897	0.0442848	0.0489174	0.0441388	0.015024	0.0373324	0.0412288	0.0227713
4066	YCG	456381	962475	750327	573793	0	1.14263e+06	448421	411860	94826.4	476839	166495	636010	287879	0.0712212	0.150201	0.117093	0.0895442	0	0.178314	0.0699791	0.0642734	0.0147983	0.0744139	0.0259827	0.0992536	0.0449254	0.128554	0.0465016	0.0736998	0.0399343	0.0358446	0.0432503	0.0144277	0.042141	0.0381083	0.011425
4068	YCG	517997	1.06034e+06	828290	623012	0	1.20066e+06	517283	466682	129103	535809	194427	723887	325120	0.0727258	0.148869	0.11629	0.0874696	0	0.16857	0.0726255	0.0655212	0.0181259	0.0752265	0.0272972	0.101632	0.0456462	0.114118	0.0453934	0.0470374	0.0404401	0.0347876	0.0368506	0.0140811	0.039686	0.0349371	0.0121523
4069	YCG	147057	284318	232111	149995	14167.6	214846	133995	132424	36282.7	146380	47678.1	194506	90843.5	0.0805968	0.155825	0.127212	0.0822068	0.00776474	0.117749	0.0734378	0.0725767	0.0198853	0.0802255	0.0261307	0.106602	0.0497881	0.123355	0.0464303	0.0565851	0.0407912	0.0436862	0.0516582	0.018524	0.0462554	0.0448574	0.0365611
4070	YCG	723673	1.47104e+06	1.10198e+06	780588	70744.6	864766	711336	595087	133479	728684	218704	967601	455601	0.0820186	0.166723	0.124895	0.0884691	0.00801794	0.0980095	0.0806202	0.0674451	0.015128	0.0825865	0.0247872	0.109664	0.0516361	0.127837	0.0459646	0.0680803	0.0394694	0.0388734	0.042769	0.0160964	0.0414044	0.0447645	0.0288549
4072	YCG	444899	891125	720965	478371	60039	606613	448524	403551	123276	457248	172235	644886	274826	0.0776904	0.155613	0.125898	0.0835355	0.0104843	0.10593	0.0783236	0.07047	0.0215271	0.0798469	0.0300765	0.112613	0.0479915	0.122694	0.0444688	0.0789589	0.0510347	0.032952	0.0397889	0.0110485	0.0350786	0.0490985	0.0163597
4073	YCG	565028	1.13995e+06	897607	623060	50972	768942	488612	523050	107526	609121	182008	752695	371502	0.0798054	0.161009	0.126779	0.0880019	0.00719936	0.108606	0.0690122	0.0738764	0.0151871	0.0860331	0.0257071	0.106312	0.0524714	0.1591	0.0488603	0.119572	0.0455424	0.0570398	0.0477568	0.0151177	0.0441653	0.0475911	0.0351799
4074	YCG	496431	970471	850976	561142	0	726192	480770	429238	105604	513163	194893	700000	310029	0.0783149	0.153097	0.134246	0.0885235	0	0.114561	0.0758443	0.0677149	0.0166597	0.0809544	0.0307456	0.110429	0.0489088	0.110225	0.0454754	0.0309367	0.0449651	0.0269828	0.0399266	0.0176188	0.0355483	0.0525036	0.0168591
4075	YCG	742369	1.61317e+06	1.20756e+06	877043	89887.6	986224	691197	639494	141333	830084	260036	1.03838e+06	505516	0.0771509	0.167649	0.125496	0.091147	0.00934159	0.102494	0.0718329	0.0664596	0.014688	0.0862667	0.0270243	0.107914	0.0525359	0.183276	0.0490842	0.123384	0.0421811	0.0438287	0.0468415	0.016888	0.0472196	0.0444876	0.0302261
4077	YCG	552081	1.12049e+06	839419	628118	0	732144	559255	487819	119060	576949	192816	793233	348083	0.0794423	0.161233	0.120789	0.0903836	0	0.105353	0.0804746	0.0701952	0.0171323	0.0830207	0.0277455	0.114143	0.0500877	0.120886	0.0454677	0.0539663	0.0415357	0.02834	0.0449522	0.0169914	0.0404215	0.0515934	0.0163758
4078	YCG	833910	1.65838e+06	1.10417e+06	796718	86788.8	940333	794980	650370	200368	792980	271101	1.12393e+06	505762	0.0854434	0.16992	0.113135	0.0816327	0.00889249	0.0963476	0.0814546	0.0666377	0.0205299	0.0812497	0.0277773	0.115159	0.0518209	0.120636	0.0461967	0.0466336	0.039329	0.035493	0.0424861	0.0167765	0.0447101	0.0438931	0.0294455
4079	YCG	797056	1.61451e+06	1.0663e+06	795436	65517.9	873852	741890	633640	180797	770328	259648	1.07446e+06	483695	0.0851817	0.172544	0.113956	0.0850086	0.00700192	0.093389	0.0792861	0.0677174	0.0193218	0.0823253	0.0277487	0.114828	0.0516927	0.125607	0.0455876	0.0525272	0.0367853	0.0363301	0.0401279	0.0150033	0.0407171	0.0476605	0.0286506
4080	YCG	784356	1.55248e+06	1.01208e+06	737389	81909.4	833983	732299	623699	185640	747183	264134	1.0784e+06	468179	0.0861765	0.17057	0.111196	0.0810163	0.00899932	0.091629	0.0804571	0.0685253	0.0203961	0.0820923	0.0290202	0.118483	0.0514384	0.117594	0.0450675	0.0458973	0.0400585	0.0388098	0.0452912	0.0155551	0.041515	0.0488238	0.0267475
4095	YCG	326819	590745	336823	330376	0	78619	331537	266211	71484.3	341134	106227	517405	213177	0.0930961	0.168277	0.0959457	0.0941093	0	0.022395	0.0944399	0.0758316	0.0203627	0.0971738	0.0302593	0.147385	0.0607244	0.129328	0.0378405	0.133962	0.0597709	0.0949833	0.0356654	0.0302771	0.0982497	0.00880588	0.0246084
4081	YLB	626469	1.24623e+06	921217	687579	0	809382	614182	548454	116523	630387	215564	877175	394834	0.0814866	0.162101	0.119825	0.0894354	0	0.105279	0.0798885	0.071339	0.0151565	0.0819963	0.0280391	0.114097	0.0513572	0.12497	0.0462655	0.0672926	0.0435263	0.0331826	0.0417803	0.0155871	0.0408328	0.0514302	0.0176002
4082	YLB	667437	1.45678e+06	1.14538e+06	822526	67271.2	878548	689024	595427	176067	731400	217223	922381	448039	0.0756945	0.165215	0.129899	0.0932833	0.00762928	0.0996368	0.0781427	0.0675278	0.0199679	0.0829487	0.0246354	0.104608	0.0508124	0.125839	0.0462337	0.0663315	0.04043	0.0517979	0.0460543	0.016492	0.0423869	0.0492081	0.0293817
4083	YLB	648761	1.26617e+06	849058	613198	56146.5	677239	593466	531557	130306	618009	204659	855015	384420	0.0873399	0.170459	0.114305	0.0825522	0.00755875	0.0911737	0.0798957	0.0715612	0.0175425	0.0831999	0.0275523	0.115107	0.0517527	0.125431	0.0465849	0.0642976	0.0431921	0.0526753	0.0501689	0.0164202	0.0458481	0.0458671	0.0242294
4085	YLB	722708	1.46776e+06	1.03833e+06	787036	55098.7	786970	680024	616250	118993	723742	226829	963507	458785	0.0835884	0.169761	0.120094	0.0910286	0.00637271	0.0910209	0.0786515	0.0712755	0.0137628	0.083708	0.0262351	0.111439	0.053063	0.132661	0.0469457	0.0744325	0.0415377	0.0504872	0.0517263	0.0169258	0.0417093	0.0441686	0.023025
4086	YLB	662457	1.31374e+06	922537	656027	57014.3	736393	616523	560201	159715	644617	217587	891403	403544	0.0844782	0.167531	0.117644	0.0836581	0.0072706	0.0939067	0.0786206	0.0714382	0.0203673	0.0822031	0.0277472	0.113674	0.0514609	0.129672	0.0470338	0.075149	0.042824	0.0655449	0.0462573	0.0159416	0.0387186	0.0444822	0.0239052
4087a	YLB	629178	1.24595e+06	817038	613008	49716.1	701541	555461	513953	109269	614816	204006	845124	384263	0.0863861	0.171069	0.112179	0.084166	0.00682602	0.0963216	0.0762647	0.0705656	0.0150027	0.0844142	0.02801	0.116035	0.0527593	0.141209	0.0489893	0.0685986	0.0434601	0.0453099	0.0521882	0.0192235	0.0439625	0.0440762	0.0265685
4087b	YLB	785985	1.56834e+06	1.05078e+06	768219	62835.1	902471	724329	650352	144151	764538	247252	1.04886e+06	492865	0.0853314	0.170269	0.114079	0.0834025	0.00682176	0.0979777	0.0786375	0.0706062	0.0156499	0.0830029	0.0268432	0.11387	0.0535084	0.138748	0.0488906	0.0630656	0.0406654	0.0439823	0.0523032	0.0174543	0.0454238	0.0468064	0.0300912
4088	YLB	559402	1.0591e+06	657521	579830	0	293167	603721	458219	132129	595344	192920	884705	0	0.0929848	0.176046	0.109294	0.0963803	0	0.0487307	0.100352	0.076166	0.0219628	0.0989592	0.0320674	0.147057	0	0.119485	0.0391066	0.0745654	0.0436584	0.0318114	0.0362451	0.0181674	0.0449	0.0216781	0
4089	YLB	804972	1.60261e+06	1.14897e+06	823913	70635.4	994632	773866	670145	187825	784028	258257	1.07785e+06	502856	0.082982	0.165208	0.118444	0.0849346	0.00728158	0.102533	0.0797754	0.0690831	0.0193622	0.080823	0.0266229	0.111112	0.0518378	0.123907	0.0466739	0.0634039	0.0399206	0.0496993	0.0463046	0.0156896	0.0408823	0.0472831	0.0293166
4092	YLB	774092	1.51143e+06	1.0643e+06	754295	76143.3	952056	716503	650987	211543	740429	275774	1.06073e+06	458315	0.0837164	0.163458	0.115102	0.0815754	0.00823474	0.102963	0.0774883	0.0704029	0.0228779	0.0800758	0.0298244	0.114716	0.0495658	0.122906	0.0463019	0.0563281	0.0398682	0.0465583	0.047844	0.0156257	0.0420681	0.0494702	0.0270334
4093	YLB	293171	517657	309121	287270	0	68159.6	301409	236704	80386.9	302896	103268	486371	196216	0.0921159	0.162651	0.0971275	0.0902618	0	0.0214161	0.0947044	0.0743739	0.025258	0.0951716	0.0324473	0.152821	0.0616522	0.118061	0.0346639	0.0544663	0.058698	0.0948027	0.0273638	0.0328034	0.149889	0.00724095	0.0316116
4094	YLB	736173	1.45634e+06	1.02465e+06	721444	69679.4	859369	695340	611906	143986	719211	248723	1.00924e+06	445202	0.0842182	0.166605	0.11722	0.0825331	0.00797132	0.0983118	0.0795469	0.070002	0.016472	0.0822777	0.0284539	0.115457	0.050931	0.121242	0.0467939	0.0641711	0.0409784	0.0469999	0.0568204	0.0172596	0.0430102	0.0521117	0.0316158
4121	YSG	768071	1.53642e+06	1.06067e+06	758543	73175.6	785575	710387	621413	157119	735954	227058	1.01229e+06	471131	0.0861278	0.172287	0.118938	0.0850594	0.00820556	0.0880907	0.0796594	0.0696823	0.0176186	0.0825264	0.0254611	0.113513	0.0528303	0.127611	0.0496069	0.0652882	0.0401437	0.0438335	0.0387365	0.0173714	0.0486441	0.0473496	0.0299592
4122	YSG	807109	1.66457e+06	1.13789e+06	854182	87156	903436	808189	672721	189237	797789	237925	1.07737e+06	497678	0.0829058	0.170984	0.116884	0.0877411	0.00895261	0.0928004	0.0830168	0.0691016	0.0194384	0.0819484	0.0244396	0.110667	0.0511212	0.121379	0.0485741	0.0604713	0.0396706	0.0479068	0.0450485	0.0147072	0.0436427	0.0483546	0.0243393
4123	YSG	318861	568970	301577	309894	0	68593.4	323931	261652	69486.7	320713	89974.1	481023	203702	0.0960896	0.17146	0.0908807	0.0933872	0	0.0206708	0.0976173	0.0788492	0.02094	0.0966477	0.0271139	0.144957	0.061386	0.122079	0.0375046	0.0427482	0.0661163	0.109003	0.0307152	0.0193038	0.0430043	0.00823752	0.0423267
4124	YSG	853148	1.70892e+06	1.16507e+06	838490	80264.5	982640	808518	711423	210749	855129	276787	1.16967e+06	523614	0.0837698	0.167798	0.114397	0.0823306	0.0078811	0.0964845	0.0793876	0.0698539	0.0206932	0.0839643	0.0271774	0.114849	0.0514132	0.12963	0.0485349	0.0497981	0.0407461	0.037097	0.0439729	0.0184173	0.0489655	0.0503551	0.0308711
4125	YSG	725713	1.48408e+06	1.09084e+06	801855	61800.2	1.03825e+06	688201	606786	150492	729692	243614	991146	452986	0.0800527	0.163707	0.120329	0.0884517	0.00681712	0.114528	0.0759147	0.066934	0.0166006	0.0804915	0.0268728	0.109332	0.0499684	0.129913	0.0482374	0.0414174	0.0410794	0.044771	0.0581807	0.0170825	0.0444882	0.0493927	0.0290357
3944	NBG	412166	949596	863513	608401	46730.8	730643	412809	467737	117792	513864	133984	563186	287405	0.0674817	0.155472	0.141378	0.09961	0.00765098	0.119624	0.0675869	0.07658	0.0192854	0.0841321	0.0219365	0.0922072	0.0470552	0.136372	0.0496635	0.0578926	0.0425052	0.0953729	0.0612522	0.0171597	0.0404389	0.0577346	0.0383123
3945	NBG	534128	1.19541e+06	992946	752684	48763.3	817722	552385	490712	148361	610885	175008	702926	361683	0.0723397	0.1619	0.13448	0.10194	0.00660426	0.110748	0.0748123	0.0664596	0.0200933	0.0827352	0.0237022	0.0952008	0.0489846	0.127747	0.0493473	0.0341096	0.0404794	0.0443011	0.0564907	0.0161937	0.0422722	0.0213843	0.0358738
3946	NBG	804369	1.58273e+06	1.22575e+06	826193	61524.4	1.14218e+06	732609	664604	205534	799958	291255	1.08312e+06	496270	0.0811175	0.159613	0.123612	0.0833183	0.0062045	0.115184	0.0738807	0.0670227	0.0207273	0.0806727	0.0293719	0.109229	0.0500468	0.115607	0.0476833	0.0203017	0.038248	0.0417622	0.0467259	0.0160403	0.0414377	0.0507922	0.0300266
3948	NBG	634454	1.35431e+06	1.09045e+06	811595	62581.4	1.02745e+06	636802	632255	196730	728051	215423	879224	428574	0.0729434	0.155705	0.12537	0.0933093	0.007195	0.118126	0.0732134	0.0726905	0.0226182	0.0837043	0.0247673	0.101085	0.0492733	0.120838	0.0500665	0.0344868	0.0408826	0.0565921	0.0496238	0.016191	0.0516868	0.0602257	0.0336924
3949	NBG	662940	1.31804e+06	1.08769e+06	740923	50237.1	1.14493e+06	585450	608902	180215	677929	242239	881858	409018	0.0771724	0.153433	0.126617	0.0862503	0.00584807	0.133281	0.0681519	0.0708819	0.0209787	0.0789172	0.0281988	0.102657	0.0476136	0.123478	0.0485647	0.0282697	0.0394498	0.0738465	0.0431887	0.0168456	0.0427446	0.0534335	0.0265011
3950	NBG	449808	951123	850001	577324	41782.6	774127	436337	460644	122322	506197	152587	604387	307264	0.0721551	0.152573	0.136351	0.0926103	0.00670247	0.12418	0.0699942	0.0738934	0.0196221	0.0812006	0.024477	0.0969516	0.0492891	0.138966	0.0512603	0.0504744	0.041868	0.0750493	0.047067	0.0178468	0.0431372	0.0644322	0.0454052
3951	NBG	644761	1.36735e+06	1.14499e+06	817530	61699.3	1.07162e+06	606914	650581	176577	699909	224984	871056	416004	0.0736536	0.156197	0.130797	0.0933896	0.00704814	0.122415	0.0693301	0.0743183	0.0201711	0.0799533	0.0257007	0.099504	0.0475217	0.140692	0.0500459	0.0478348	0.0408668	0.0862163	0.0454188	0.0159493	0.0426375	0.058141	0.0357403
3952	NBG	504049	1.11757e+06	939482	676983	43711.7	804358	502283	492677	120048	590309	168839	694487	344193	0.0720174	0.159676	0.134231	0.0967257	0.00624543	0.114925	0.071765	0.0703925	0.0171521	0.084342	0.0241233	0.0992267	0.0491774	0.171281	0.0505248	0.0726416	0.0429002	0.0657926	0.0652524	0.0173917	0.0459295	0.0539273	0.0333532
3953	NBG	598523	1.33032e+06	1.24533e+06	826506	67001.2	1.04661e+06	610842	584124	155596	723460	209884	839624	412901	0.0691877	0.153782	0.143956	0.0955419	0.00774516	0.120985	0.0706117	0.0675232	0.0179865	0.08363	0.024262	0.0970583	0.0477303	0.128539	0.048387	0.0396257	0.0398264	0.0499029	0.0495504	0.0159798	0.0401152	0.056345	0.0366631
3954	NBG	664040	1.31865e+06	1.0443e+06	712306	57648.4	998672	588822	555403	147033	673171	235400	914113	416936	0.0797503	0.158368	0.125419	0.085547	0.0069235	0.119939	0.0707167	0.0667031	0.0176585	0.0808468	0.0282712	0.109784	0.0500734	0.121958	0.0480817	0.0269433	0.0407994	0.0435168	0.0477921	0.0167869	0.0442233	0.0509773	0.0300333
3955	NBG	473867	1.12486e+06	1.04976e+06	750737	52168.4	914646	523241	535976	130111	625394	152670	659987	345406	0.0645699	0.153275	0.143042	0.102297	0.00710856	0.124631	0.0712976	0.073033	0.0177291	0.0852172	0.020803	0.0899309	0.0470656	0.142351	0.0505902	0.0410222	0.04029	0.0839935	0.0490113	0.0172802	0.0462259	0.0584152	0.0277978
3957	NBG	824012	1.67181e+06	1.36581e+06	901526	77172.8	1.34431e+06	783208	691297	233587	850020	299781	1.12686e+06	534137	0.076985	0.156192	0.127603	0.0842269	0.00721003	0.125595	0.0731729	0.0645859	0.0218233	0.0794149	0.0280077	0.10528	0.0499029	0.113997	0.0464262	0.0265594	0.0396626	0.040819	0.0406833	0.0162492	0.0415485	0.0499254	0.0280807
4544	NQS	346654	670093	582680	330115	45815.1	709383	285162	302275	117275	321009	126394	440293	211302	0.0772324	0.149293	0.129818	0.0735477	0.0102073	0.158046	0.0635324	0.0673451	0.0261282	0.0715188	0.0281598	0.0980947	0.0470768	0.134745	0.0431298	0.0565867	0.0475543	0.0668158	0.0438328	0.0152724	0.0367964	0.0329588	0.0100667
4545	NQS	715833	1.3715e+06	889006	646220	70969.6	647532	655933	620521	101162	679648	237673	969838	453182	0.0888237	0.170182	0.110312	0.080186	0.00880623	0.0803487	0.0813911	0.0769971	0.0125526	0.0843338	0.0294915	0.120342	0.0562329	0.129588	0.0455204	0.0524123	0.0402771	0.0567225	0.0375906	0.019592	0.0429411	0.0348463	0.00805973
4546	NQS	415959	846909	577029	434282	39693.5	395269	365876	381204	69143.8	420503	115707	563548	276540	0.0848607	0.17278	0.117721	0.0885988	0.00809796	0.0806398	0.0746432	0.0777704	0.0141062	0.0857879	0.0236057	0.114971	0.0564175	0.15331	0.0514116	0.315395	0.0521257	0.0747652	0.0475526	0.0158903	0.050311	0.0448679	0.0263555
4547	NQS	481980	1.00092e+06	676623	480811	39971.6	487537	475223	431960	116770	495010	145644	655713	313099	0.0830818	0.172536	0.116634	0.0828803	0.00689015	0.0840398	0.0819171	0.0744595	0.0201284	0.0853279	0.0251056	0.113029	0.0539709	0.165142	0.0518826	0.333219	0.0498373	0.0466599	0.0473937	0.0145931	0.0508498	0.034631	0.00997935
