# Supplementary material for: Provenancing Archaeological Wool Textiles from Medieval Northern Europe by Light Stable Isotope Analysis (δ13C, δ15N, δ2H)
Source: PLoS One. 2016 Oct 20;11(10):e0162330. doi: 10.1371/journal.pone.0162330 (PMC5072590; doi:10.1371/journal.pone.0162330)
Supplement: S6 Table — (XLSX) [file pone.0162330.s006.xlsx]

## Sheet: Holstein2016S6table
Tests for association between isotopic, elemental and AA variables
(Spearman’s rank correlation coefficient, with Bonferroni correction)
Associations not tested for assemblages with n<10 samples
Hessens	[Asx]%	[Glx]%	[Ser]%	[L-Thr]%	[L-His]%	[Gly]%	[L-Arg]%	[Ala]%	[Tyr]%	[Val]%	[Phe]%	[Leu]%	[Ile]%	Asxdl	Glxdl	Serdl	Aladl	Tyrdl	Valdl	Phedl	Leudl	Iledl
δ13C/‰	ns	ns	ns	ns	NA	ns	ns	ns	ns	ns	ns	ns	ns	ns	ns	ns	ns	ns	ns	ns	ns	ns
δ15N/‰	ns	ns	ns	ns	NA	ns	ns	ns	ns	ns	ns	ns	ns	ns	ns	ns	ns	ns	ns	ns	ns	ns
δ2H/‰	ns	ns	ns	ns	NA	ns	ns	ns	ns	ns	ns	ns	ns	ns	ns	ns	ns	ns	ns	ns	ns	ns
C:Natom	ns	ns	ns	ns	NA	ns	ns	ns	ns	ns	ns	ns	ns	ns	ns	ns	ns	ns	ns	ns	ns	ns
Reykholt	[Asx]%	[Glx]%	[Ser]%	[L-Thr]%	[L-His]%	[Gly]%	[L-Arg]%	[Ala]%	[Tyr]%	[Val]%	[Phe]%	[Leu]%	[Ile]%	Asxdl	Glxdl	Serdl	Aladl	Tyrdl	Valdl	Phedl	Leudl	Iledl
δ13C/‰	ns	ns	ns	ns	ns	ns	ns	ns	ns	ns	ns	ns	ns	ns	ns	ns	ns	ns	ns	ns	ns	ns
δ15N/‰	ns	ns	ns	ns	ns	ns	ns	ns	ns	ns	ns	ns	ns	ns	ns	ns	ns	ns	ns	ns	ns	ns
δ2H/‰	ns	ns	ns	ns	ns	ns	ns	ns	ns	ns	ns	ns	ns	ns	ns	ns	ns	ns	ns	ns	ns	ns
C:Natom	ns	ns	ns	ns	ns	ns	ns	ns	ns	ns	ns	ns	ns	ns	ns	ns	ns	ns	0.0017512	ns	ns	ns
NBG	[Asx]%	[Glx]%	[Ser]%	[L-Thr]%	[L-His]%	[Gly]%	[L-Arg]%	[Ala]%	[Tyr]%	[Val]%	[Phe]%	[Leu]%	[Ile]%	Asxdl	Glxdl	Serdl	Aladl	Tyrdl	Valdl	Phedl	Leudl	Iledl
δ13C/‰	ns	ns	ns	ns	NA	ns	NA	ns	NA	ns	ns	ns	NA	ns	ns	ns	ns	ns	ns	ns	ns	ns
δ15N/‰	ns	ns	ns	ns	NA	ns	NA	ns	NA	ns	ns	ns	NA	ns	ns	ns	ns	ns	ns	ns	ns	ns
δ2H/‰	0.00549	ns	ns	ns	NA	ns	NA	ns	NA	ns	ns	ns	NA	ns	ns	ns	ns	ns	ns	ns	ns	ns
C:Natom	ns	ns	ns	ns	NA	ns	NA	ns	NA	ns	ns	ns	NA	ns	ns	ns	ns	ns	ns	ns	ns	ns
YCG	[Asx]%	[Glx]%	[Ser]%	[L-Thr]%	[L-His]%	[Gly]%	[L-Arg]%	[Ala]%	[Tyr]%	[Val]%	[Phe]%	[Leu]%	[Ile]%	Asxdl	Glxdl	Serdl	Aladl	Tyrdl	Valdl	Phedl	Leudl	Iledl
δ13C/‰	ns	ns	ns	ns	ns	ns	ns	ns	ns	ns	ns	ns	ns	ns	ns	ns	ns	ns	ns	ns	ns	ns
δ15N/‰	ns	ns	ns	ns	ns	ns	ns	ns	ns	ns	ns	ns	ns	ns	ns	ns	ns	ns	ns	ns	ns	ns
δ2H/‰	ns	ns	ns	ns	ns	ns	ns	ns	ns	ns	ns	ns	ns	ns	ns	ns	ns	ns	ns	ns	ns	ns
C:Natom	ns	ns	ns	ns	ns	ns	ns	ns	ns	ns	ns	ns	ns	ns	ns	ns	ns	ns	0.0017512	ns	ns	ns
YLB	[Asx]%	[Glx]%	[Ser]%	[L-Thr]%	[L-His]%	[Gly]%	[L-Arg]%	[Ala]%	[Tyr]%	[Val]%	[Phe]%	[Leu]%	[Ile]%	Asxdl	Glxdl	Serdl	Aladl	Tyrdl	Valdl	Phedl	Leudl	Iledl
δ13C/‰	ns	ns	ns	ns	ns	ns	ns	ns	ns	ns	ns	ns	ns	ns	ns	ns	ns	ns	ns	ns	ns	ns
δ15N/‰	ns	ns	ns	ns	ns	ns	ns	ns	ns	ns	ns	ns	ns	ns	ns	ns	ns	ns	ns	ns	ns	ns
δ2H/‰	ns	ns	ns	ns	ns	ns	ns	ns	ns	ns	ns	ns	ns	ns	ns	ns	ns	ns	ns	ns	ns	ns
C:Natom	ns	ns	ns	ns	ns	ns	ns	ns	ns	ns	ns	ns	ns	ns	ns	ns	ns	ns	ns	ns	ns	ns
Significance of differences in isotopic composition between archaeological settlements										Significance of differences in isotopic composition between archaeological regions
Mann-Whitney test with Bonferroni correction										Mann-Whitney test with Bonferroni correction
Textile keratin:					Bone collagen:					Textile keratin:					Bone collagen:
δ13C/‰	Reykholt	Newcastle	York		δ13C/‰	Reykholt	Newcastle	York		δ13C/‰	GB	IS			δ13C/‰	GB	IS
Hessens	ns	0.008544	0.019476		Hessens	0.028224	0.003819	0.0042174		DE	0.003084	ns			DE	0.0007446	0.014112
Reykholt		ns	ns		Reykholt		ns	ns		GB		ns			GB		ns
Newcastle			ns		Newcastle			ns
δ15N/‰	Reykholt	Newcastle	York		δ15N/‰	Reykholt	Newcastle	York		δ15N/‰	GB	IS			δ15N/‰	GB	IS
Hessens	0.0001566	0.017388	0.021252		Hessens	0.012846	0.0054276	0.0055524		DE	0.004317	7.83e-05			DE	0.0010833	0.006423
Reykholt		8.46e-06	1.014e-07		Reykholt		0.0040674	0.006216		GB		0			GB		0.0009282
Newcastle			ns		Newcastle			ns
δ2H/‰	Reykholt	Newcastle	York		δ2H/‰	Reykholt	Newcastle	York		δ2H/‰	GB	IS			δ2H/‰	GB	IS
Hessens	ns	ns	ns		Hessens	0.012414	0.008778	0.007098		DE	ns	ns			DE	0.0016881	0.006207
Reykholt		0.0039912	0.024594		Reykholt		0.0057414	0.049194		GB		0.001542			GB		0.003024
Newcastle			ns		Newcastle			ns
Significance of differences in isotopic composition distribution between archaeological settlements and regions
Kolmogorov-Smirnov test
Textile keratin:					Bone collagen:
	Location	Region				Location	Region
δ13C/‰	0.001648	0.001718			δ13C/‰	0.0003162	0.0002087
δ15N/‰	1.209e-09	3.392e-10			δ15N/‰	2.038e-05	4.974e-06
δ2H/‰	0.001081	0.001616			δ2H/‰	5.589e-05	1.68e-05
randomForest classification
Classification matrices of 500 trees
Textile keratin, to settlement				Textile keratin, to region				Bone collagen, to settlement				Bone collagen, to region
	% correctly classified				% correctly classified				% correctly classified				% correctly classified
Hessens	0.6			DE	0.6			Hessens	0.857143			DE	0.857143
Newcastle	0.5			GB	0.961538			Newcastle	0.655172			GB	0.977778
Reykholt	0.761905			IS	0.761905			Reykholt	0.857143			IS	0.857143
York	0.777778			Overall	0.774481			York	0.375			Overall	0.897354
Overall	0.659921							Overall	0.686115
